# Supplementary material for: Liquid-state quantitative SERS analyzer on self-ordered metal liquid-like plasmonic arrays
Source: PubMed Central journal article supplement (PMC6128918; doi:10.1038/s41467-018-05920-z), 2018-09-07
Supplement: 41467_2018_5920_MOESM3_ESM.pdf [file 41467_2018_5920_MOESM3_ESM.pdf]

### **Descriptions of Additional Supplementary Files**

File Name: Supplementary Movie 1

Description: Three cycles of reversible O/W transition of metal liquid-like GNR arrays in cuvettes with hydroxylated and fluorosilylated treatments.
